# Supplementary material
Source: PubMed Central journal article supplement (PMC3082855)
Supplement: 97320630006064S1.pdf [file 97320630006064S1.pdf]

## Supplementary material:

**Table 1:** Details of the specific primers developed viz. *P. westermani*-specific, *F. buski*-specific and *F. gigantica*-specific (PwAR1, FbMR1 and FgMR1)

| Parasite             | Specific primer name | Primer Sequence      | Length (bp) | Accession number | Tm    | GC% |
|----------------------|----------------------|----------------------|-------------|------------------|-------|-----|
| <i>P. westermani</i> | PwAR1                | ATAGATCTGGCACCCACAG  | 20          | DQ351845         | 59.95 | 55  |
| <i>F. buski</i>      | FbMR1                | TTAAACCACGATCCCGCTAC | 20          | DQ351842         | 59.96 | 50  |
| <i>F. gigantica</i>  | FgMR1                | CCAAGTTCAGCATCAAACCA | 20          | EF027103         | 59.96 | 45  |
